# Supplementary material for: GPR124/WNT signaling regulates hyaloid blood vessel regression and endothelial-mesenchymal transition
Source: Research Square preprint supplement (doi:10.21203/rs.3.rs-7051426/v1), 2025-08-18
Supplement: Supplementary file 1 [file f6fd93ff298c9d2782a3c0b7.pdf]

Figure S1

**A** Vitreous body flatmounts (P8)

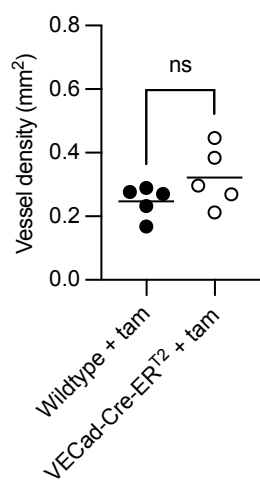

**B** Vitreous body flatmounts

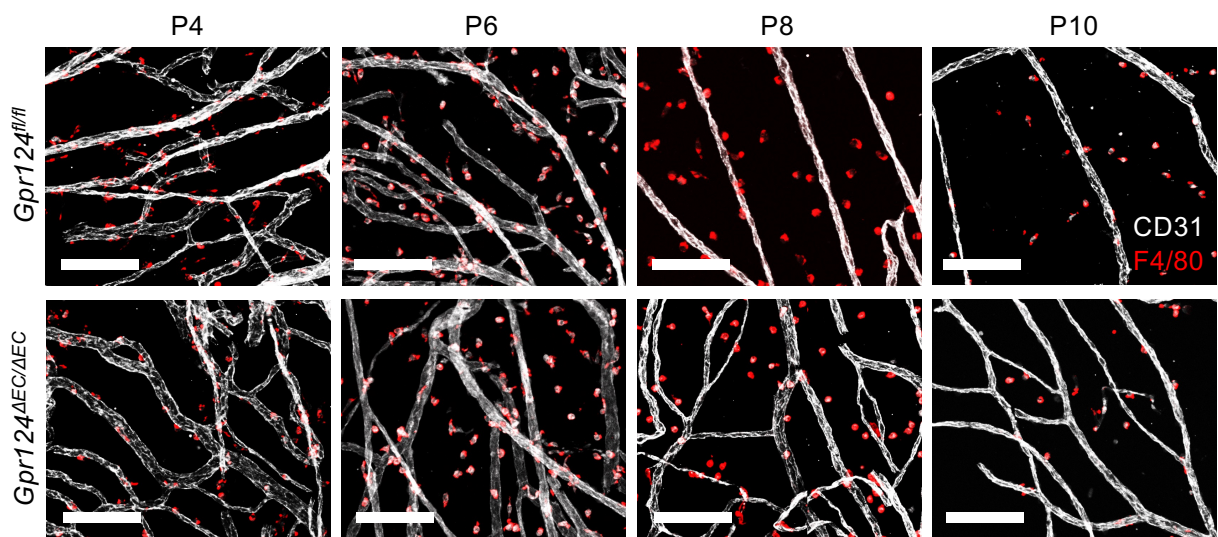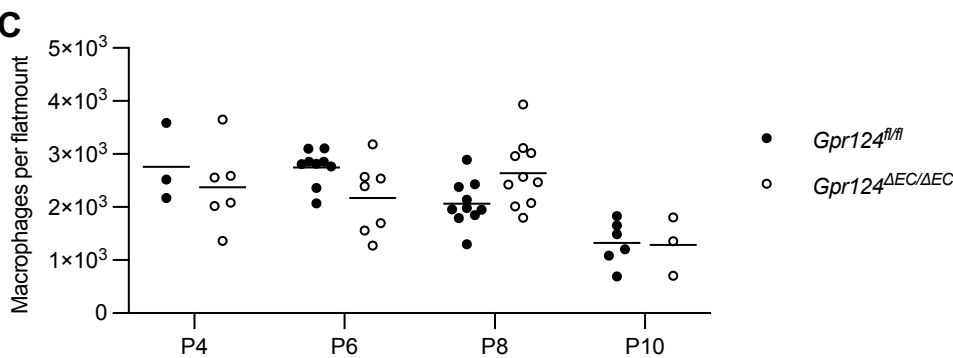

**Figure S1. The VECad-Cre-ER<sup>T2</sup> transgene does not affect hyaloid blood vessel regression, and endothelial GPR124 does not regulate hyaloid macrophage numbers. Related to Figure 1.**

**(A)** Quantification of CD31 signal density (vessel density) in vitreous body flatmounts from P8 wildtype vs VECad-Cre-ER<sup>T2</sup> transgenic mice treated with tamoxifen (P1-P4). Horizontal lines represent mean values from biological replicates ( $n \geq 5$ ). P, postnatal day; VECad-Cre-ER<sup>T2</sup>, vascular endothelial cadherin promoter-driven Cre recombinase fused to tamoxifen-responsive estrogen receptor; tam, tamoxifen. ns, not significant.

**(B)** Representative images of CD31 (white) and F4/80 (red) co-immunofluorescence staining of vitreous body flatmounts from *Gpr124<sup>fl/fl</sup>* and *Gpr124<sup>ΔEC/ΔEC</sup>* mice at indicated postnatal days. Scale bar: 50  $\mu$ m.

**(C)** Quantification of F4/80-positive macrophage number per flatmount in biological replicates ( $n \geq 3$ ) of (B). Horizontal lines represent mean values. No significant differences between genotypes were observed.

Figure S2

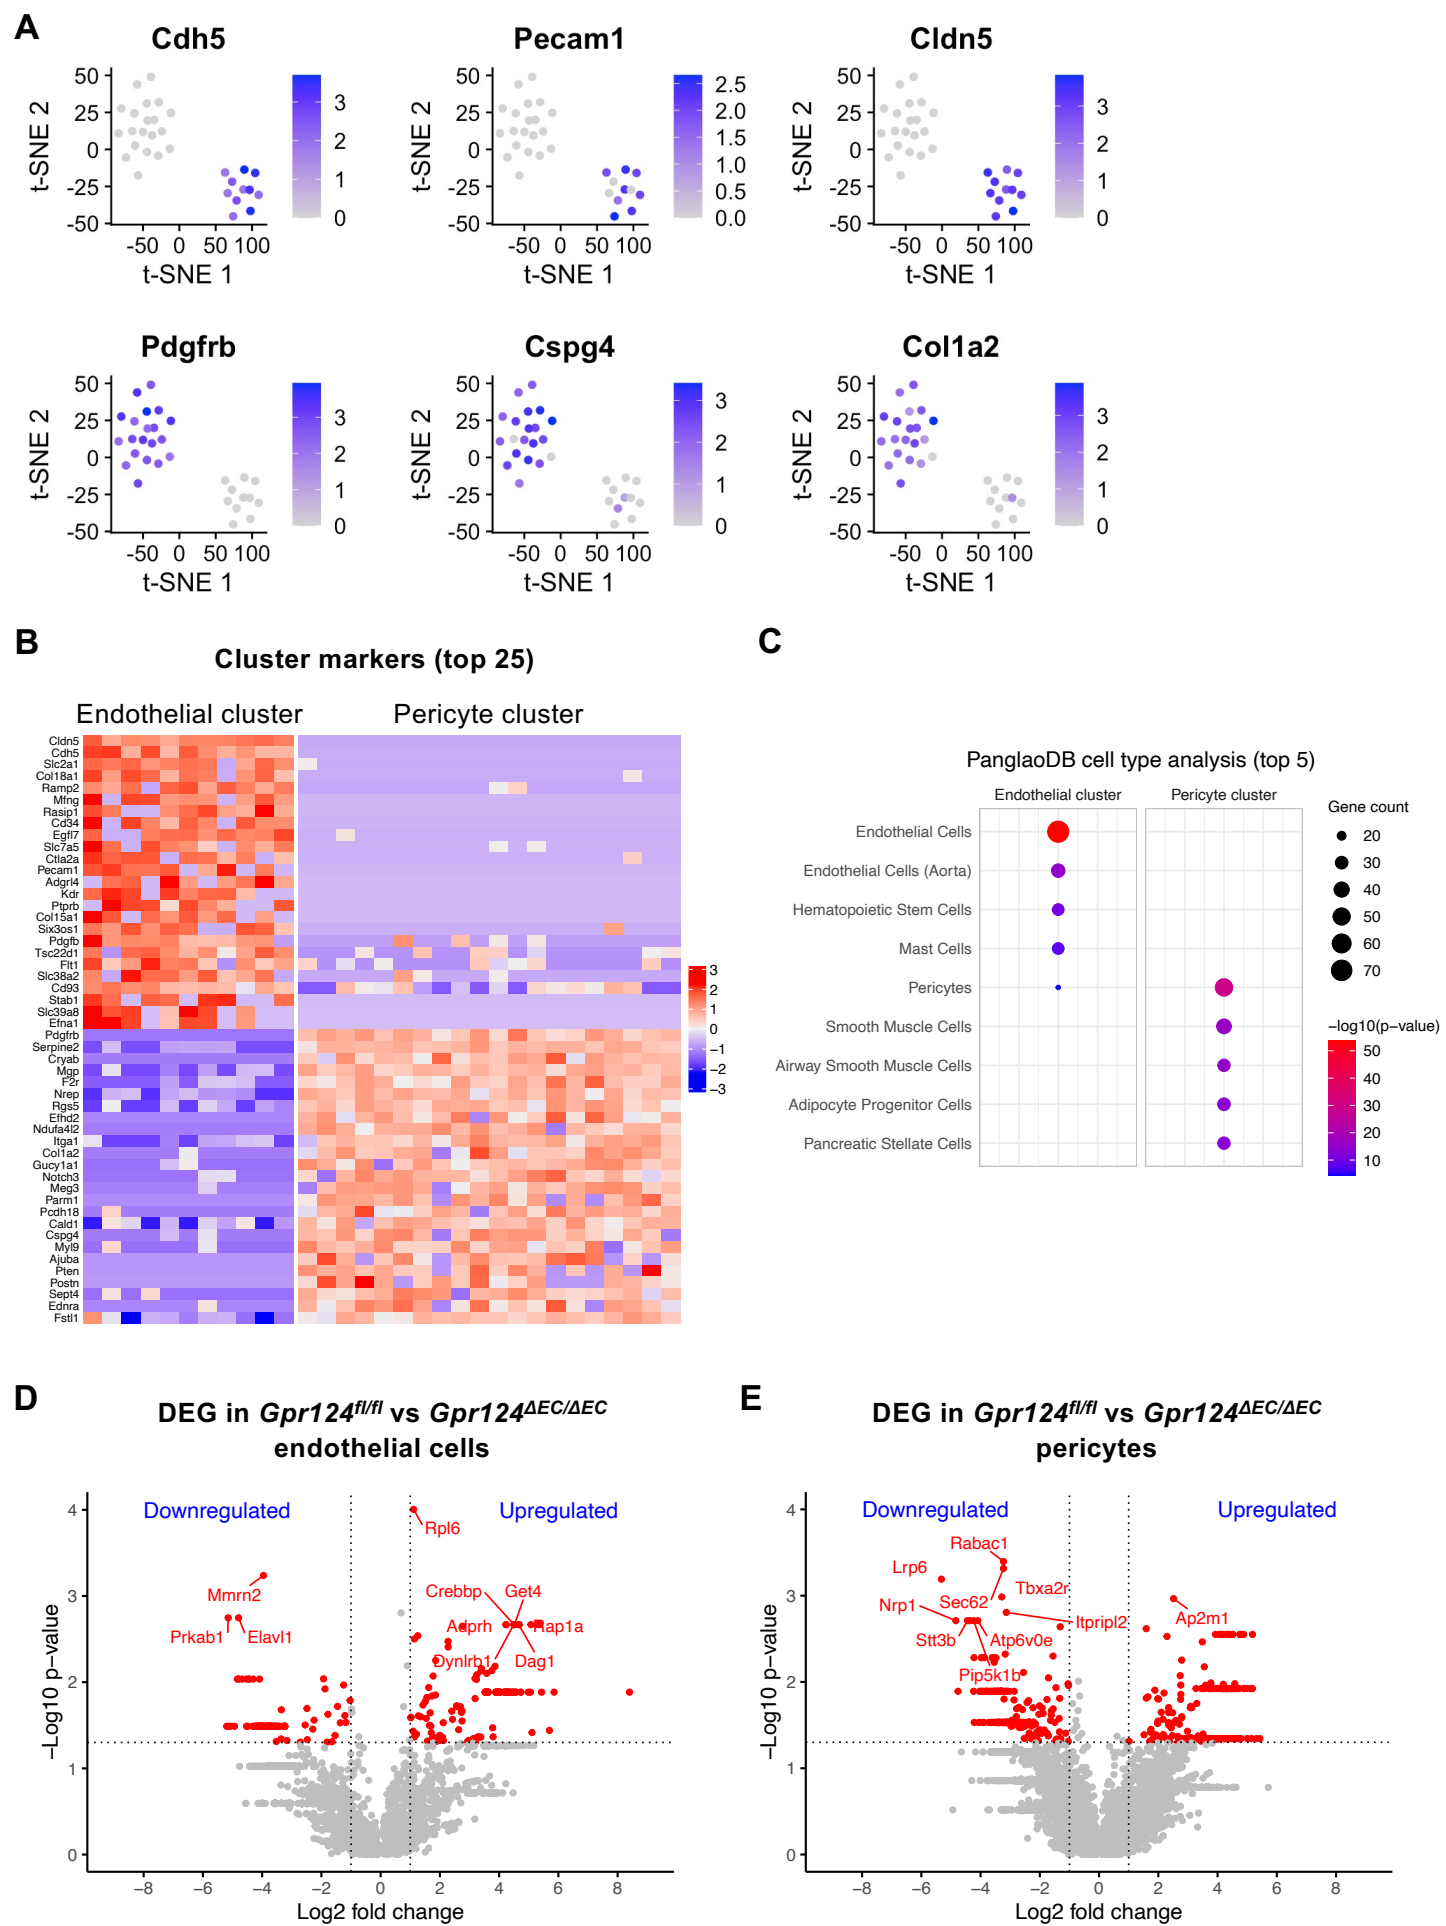

**Figure S2. Single-cell RNA sequencing analysis of P6 hyaloid blood vessels. Related to Figure 5.**

**(A)** t-SNE plots of sequenced cells displaying log-normalized mRNA expression (UMI counts) of indicated endothelial (top) and pericyte markers (bottom). t-SNE, t-distributed stochastic neighbor embedding; UMI, unique molecular identifier.

**(B)** Heatmap (scaled UMI counts) illustrating the top 25 differentially expressed genes (by p-value) between the endothelial and pericyte clusters. Red = upregulated, blue = downregulated or not detected.

**(C)** PanglaoDB cell type analysis using all markers from the indicated clusters. The top five identified cell types (by p-value) are shown. Gene count (circle size) indicates the number of matching genes.

**(D-E)** Volcano plots depicting differentially expressed genes (red dots) between P6 *Gpr124<sup>fl/fl</sup>* vs *Gpr124<sup>ΔEC/ΔEC</sup>* hyaloid endothelial cells **(D)** or pericytes **(E)**. The top ten differentially expressed genes (by p-value) are labeled. Differential expression criteria: absolute log2 fold change > 1 and  $p < 0.05$ . P, postnatal day; DEG, differentially expressed genes.

Figure S3

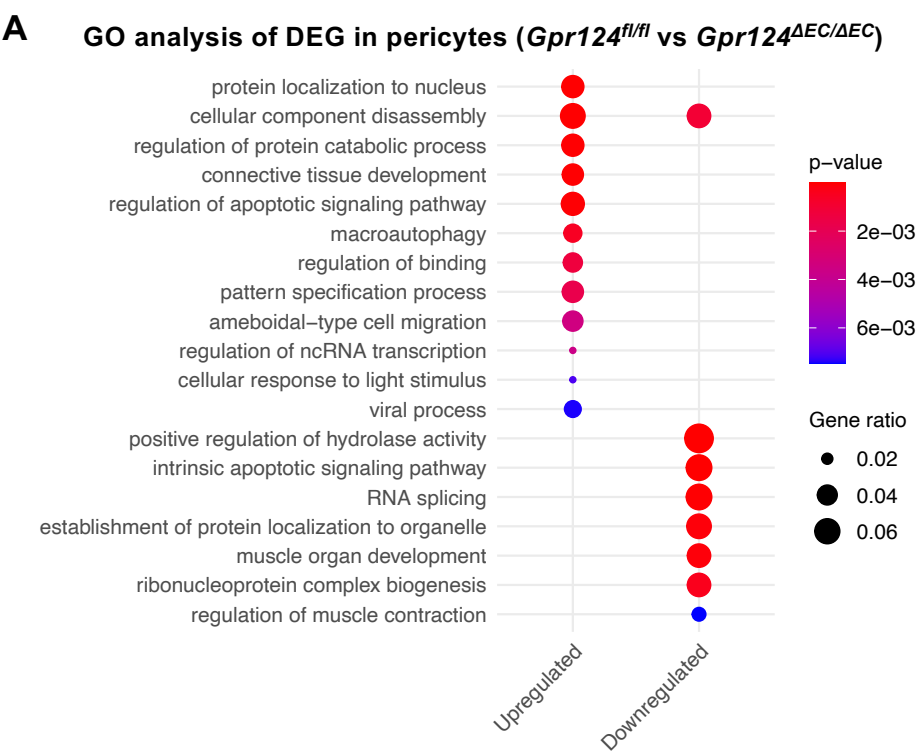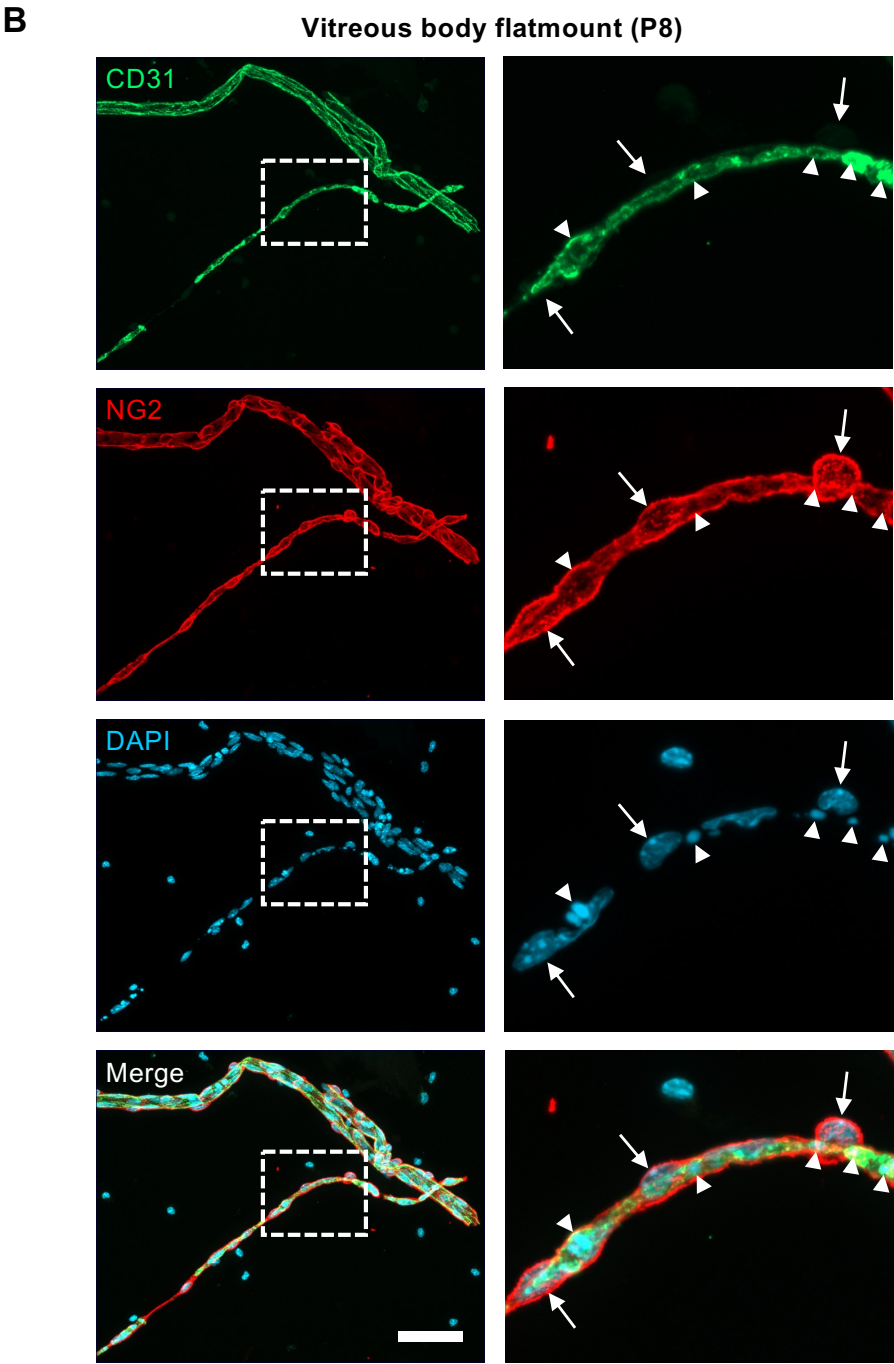

**Figure S3. Analyses of hyaloid pericytes. Related to Figure 5.**

**(A)** GO Biological Process analysis of differentially expressed genes between P6 *Gpr124<sup>fl/fl</sup>* vs *Gpr124<sup>ΔEC/ΔEC</sup>* hyaloid pericytes. Upregulated and downregulated genes were analyzed separately (columns). Redundant and semantically similar terms were consolidated into representative terms. Gene ratio = overlapping genes : input genes. P, postnatal day; GO gene ontology; DEG, differentially expressed genes.

**(B)** Representative images of CD31 (green), NG2 (red), and DAPI (blue) co-immunofluorescence staining of vitreous body flatmounts from P8 control mice (*Gpr124<sup>fl/fl</sup>*). Dashed boxes are shown at higher magnification on the right. Arrows indicate pericyte nuclei. Arrowheads denote endothelial cell nuclei. Scale bar: 50  $\mu$ m.
